# Supplementary material
Source: Springer Nature journal article supplement (https://www.springermedizin.de/resource/supplementary/13053_2014_467_MOESM4_ESM.pdf/9673880)

A

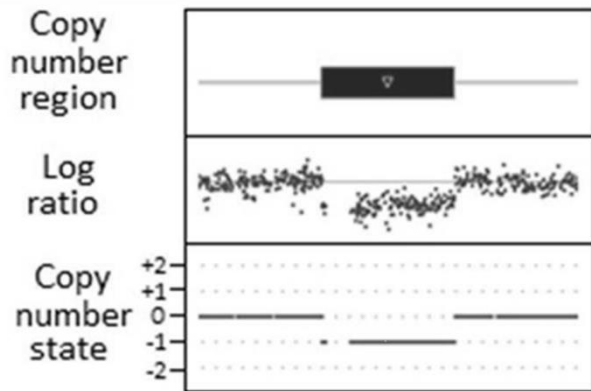

C

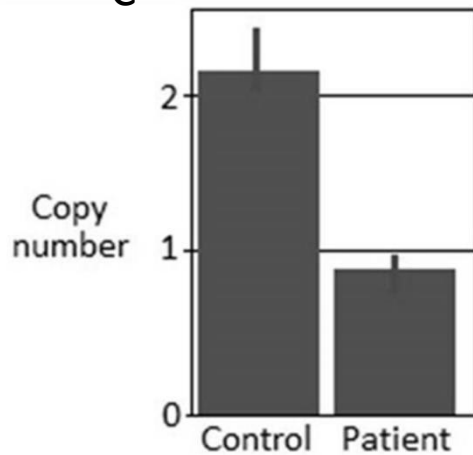

B

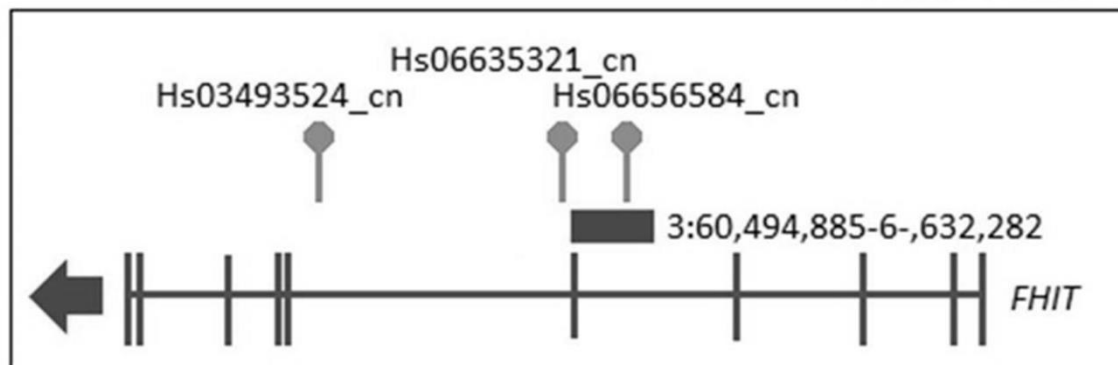

Supplement: MOESM4 [file 9673880]
